# Supplementary material
Source: Springer Nature journal article supplement (https://www.springermedizin.de/resource/supplementary/12913_2013_3150_MOESM4_ESM.pdf/9532502)

Figure 1: Percent births at home

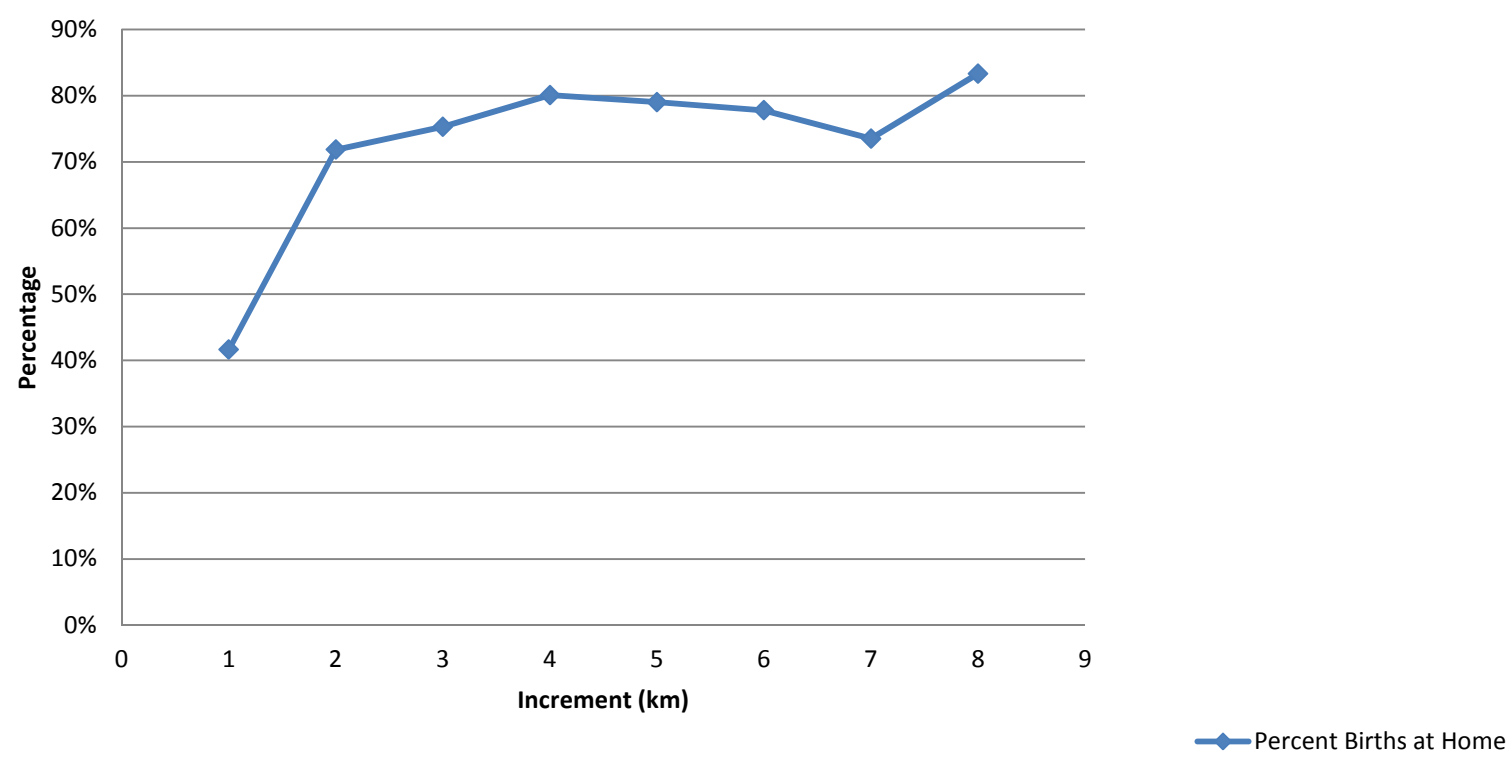

Supplement: MOESM4 [file 9532502]
